# Supplementary material for: Large indel detection in region-based phased diploid assemblies from linked-reads
Source: Springer Nature journal article supplement (doi:10.1186/s12864-025-11398-z), 2025-03-18
Supplement: MOESM1 [file 12864_2025_11398_MOESM1_ESM.pdf]

# **Large indel detection in region-based phased diploid assemblies from linked-reads**

**Can Luo, Brock A. Peters, and Xin Maizie Zhou**

**Supplementary Information**

| Deletions |             | flanking region<br>(10kb) | flanking region<br>(25kb) | flanking region<br>(50kb) | flanking region<br>(100kb) |
|-----------|-------------|---------------------------|---------------------------|---------------------------|----------------------------|
| 50-1k     | benchmark   | 58                        |                           |                           |                            |
|           | TP          | 35                        | 48                        | 48                        | 49                         |
|           | TP_GT       | 28                        | 40                        | 41                        | 39                         |
|           | FP          | 28                        | 53                        | 76                        | 123                        |
|           | FN          | 23                        | 10                        | 10                        | 9                          |
|           | Recall      | 60.3%                     | 82.8%                     | 82.8%                     | 84.5%                      |
|           | Precision   | 55.6%                     | 47.5%                     | 38.7%                     | 28.5%                      |
|           | F1          | 57.9%                     | 60.4%                     | 52.7%                     | 42.6%                      |
|           | GT_accuracy | 80.0%                     | 83.3%                     | 85.4%                     | 79.6%                      |
| 1k-10k    | benchmark   | 7                         |                           |                           |                            |
|           | TP          | 3                         | 6                         | 6                         | 5                          |
|           | TP_GT       | 3                         | 6                         | 6                         | 5                          |
|           | FP          | 0                         | 1                         | 7                         | 6                          |
|           | FN          | 4                         | 1                         | 1                         | 2                          |
|           | Recall      | 42.9%                     | 85.7%                     | 85.7%                     | 71.4%                      |
|           | Precision   | 100.0%                    | 85.7%                     | 46.2%                     | 45.5%                      |
|           | F1          | 60.0%                     | 85.7%                     | 60.0%                     | 55.6%                      |
|           | GT_accuracy | 100.0%                    | 100.0%                    | 100.0%                    | 100.0%                     |

Table S1: Evaluation of deletions ( $\geq 50$ bp) on chromosome 21 in HG002 from stLFR linked-reads by different lengths of flanking regions in RegionIndel. Abbreviations: true positives (TP), false positives (FP), false negatives (FN), and genotype (GT).

| Insertions |             | flanking region<br>(10kb) | flanking region<br>(25kb) | flanking region<br>(50kb) | flanking region<br>(100kb) |
|------------|-------------|---------------------------|---------------------------|---------------------------|----------------------------|
| 50-1k      | benchmark   | 95                        |                           |                           |                            |
|            | TP          | 14                        | 19                        | 23                        | 22                         |
|            | TP_GT       | 8                         | 13                        | 12                        | 10                         |
|            | FP          | 1                         | 3                         | 5                         | 8                          |
|            | FN          | 81                        | 76                        | 72                        | 73                         |
|            | Recall      | 14.7%                     | 20.0%                     | 24.2%                     | 23.2%                      |
|            | Precision   | 93.3%                     | 86.4%                     | 82.1%                     | 73.3%                      |
|            | F1          | 25.5%                     | 32.5%                     | 37.4%                     | 35.2%                      |
|            | GT_accuracy | 57.1%                     | 68.4%                     | 52.2%                     | 45.4%                      |
| 1k-10k     | benchmark   | 16                        |                           |                           |                            |
|            | TP          | 1                         | 1                         | 1                         | 1                          |
|            | TP_GT       | 0                         | 0                         | 0                         | 0                          |
|            | FP          | 0                         | 0                         | 0                         | 0                          |
|            | FN          | 15                        | 15                        | 15                        | 15                         |
|            | Recall      | 6.2%                      | 6.2%                      | 6.2%                      | 6.2%                       |
|            | Precision   | 100.0%                    | 100.0%                    | 100.0%                    | 100.0%                     |
|            | F1          | 11.8%                     | 11.8%                     | 11.8%                     | 11.8%                      |
|            | GT_accuracy | 0.0%                      | 0.0%                      | 0.0%                      | 0.0%                       |

Table S2: Evaluation of insertions ( $\geq 50$ bp) on chromosome 21 in HG002 from stLFR linked-reads by different lengths of flanking regions in RegionIndel. Abbreviations: true positives (TP), false positives (FP), false negatives (FN), and genotype (GT).

**A** 5.75kb homozygous deletion from 10X linked-reads

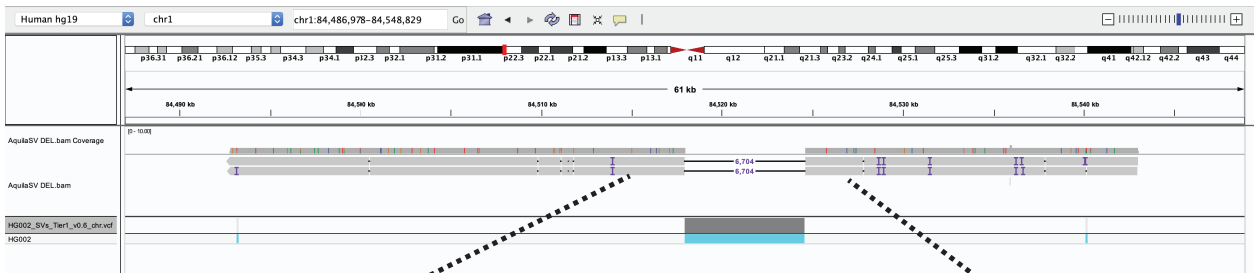

**B**

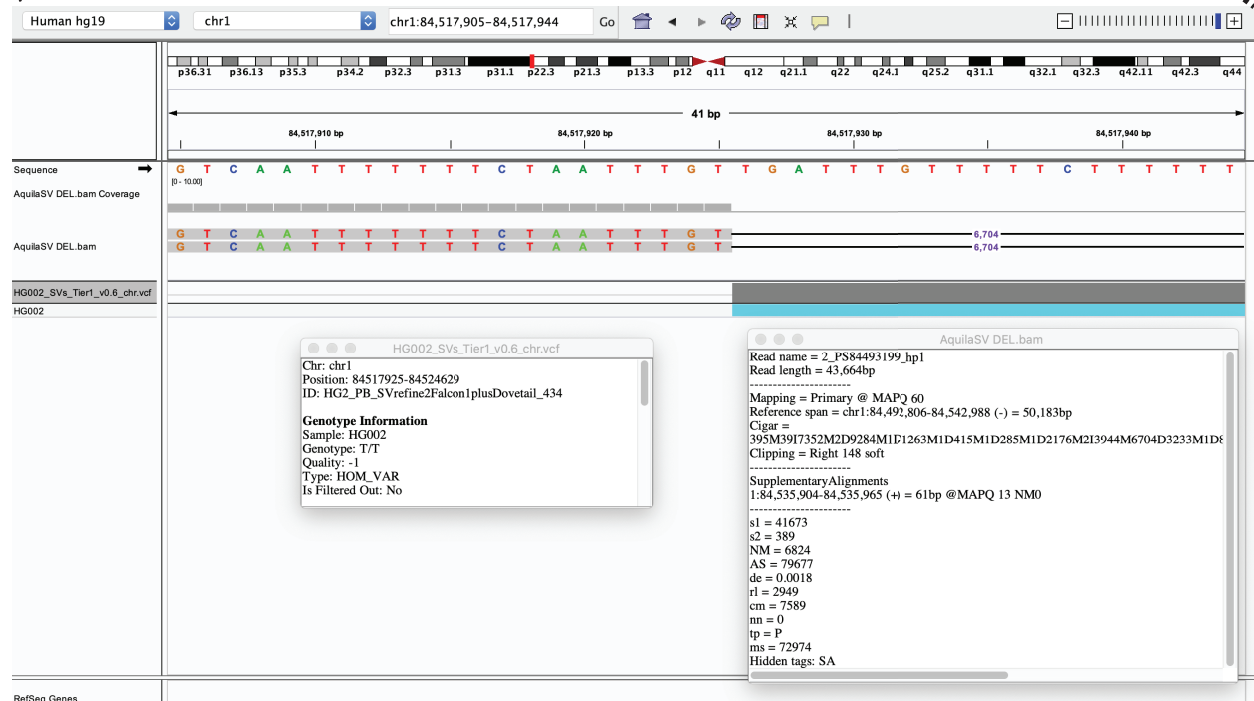

Fig. S1: One example of 5.75kb homozygous deletion from the 10X linked-reads data by RegionIndel. A. The IGV displays assembled diploid contigs from AquiaSV. It includes tracks for the contig BAM file from RegionIndel and the GiaB benchmark VCF file. The contigs also show there are several variants in the nearby region. B. It is a zoom-in view of the target SV in the center. The left inset box has the description about this benchmark SV, and the right inset box has the description about the contig information generated by RegionIndel. The gold standard supports this homozygous deletion. The contigs indicates this 6704bp deletion is identified by contigs from both haplotypes.

**A** 109bp heterozygous insertion from stLFR linked-reads

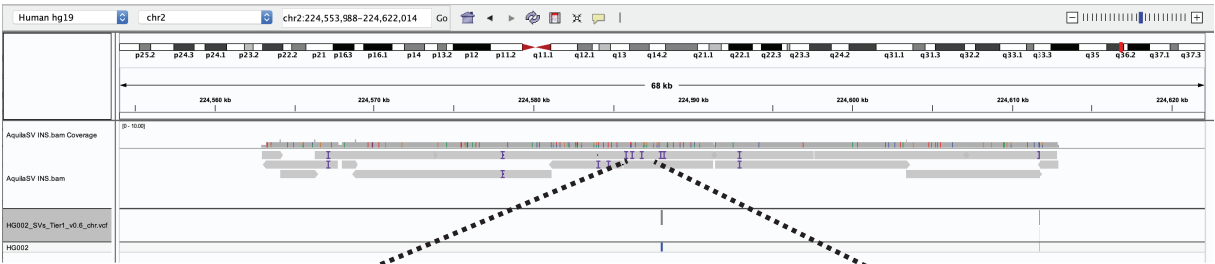

**B**

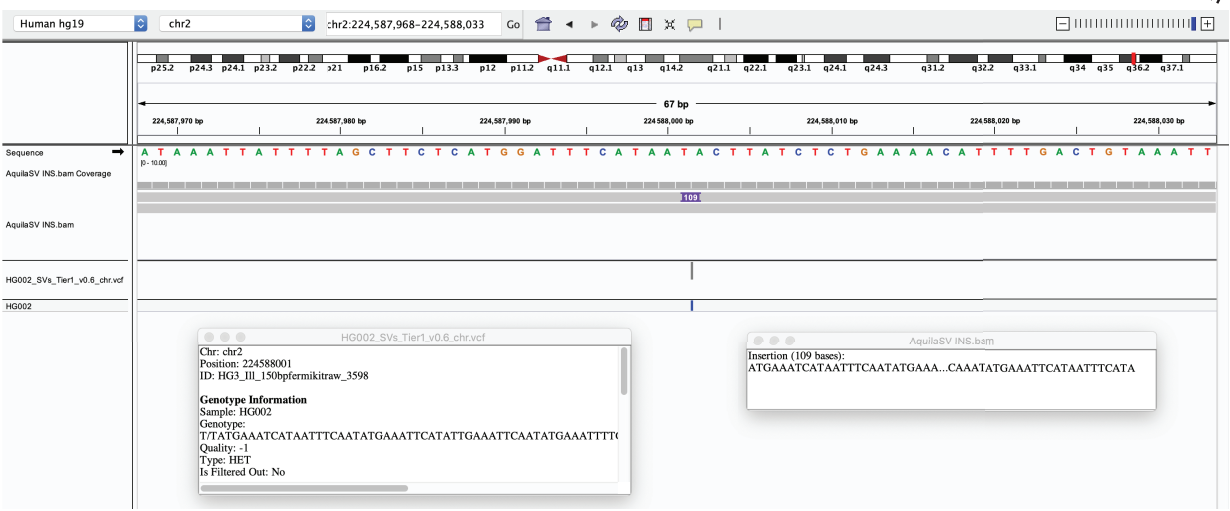

Fig. S2: One example of 109bp heterozygous insertion from the stLFR linked-reads data by RegionIndel. A. The IGV displays assembled diploid contigs from AquiaSV. It includes tracks for the contig BAM file from RegionIndel and the GiaB benchmark VCF file. The contigs also show that there are several variants in the nearby region. B. It is a zoom-in view of the target SV in the center. The left inset box has the description about this benchmark SV, and the right inset box has the description about the contig information generated by RegionIndel. It indicates that this insertion is identified from the contig of haplotype1. The gold standard supports this heterozygous insertion.
